# Supplementary material for: Rational design of single-atom catalysts for efficient H 2 O 2 production via a four-step strategy
Source: Royal Society of Chemistry journal article supplement (doi:10.1039/d4ma00732h), 2024-01-01
Supplement: d4ma00732h1.pdf [file d4ma00732h1.pdf]

## Supporting Information

### **Rational design of single-atom catalysts for efficient H<sub>2</sub>O<sub>2</sub> production via a four-step strategy**

*Shu-Long Li<sup>a,b,c</sup>, Xiaogui Song<sup>a</sup>, Zuhui Zhou<sup>a</sup>, Hongyuan Zhou<sup>a</sup>, Liang Qiao<sup>b\*</sup>, Yong Zhao<sup>a,d\*</sup>, and Li-Yong Gan<sup>e\*</sup>*

<sup>a</sup>Institute for Advanced Study, Chengdu University, Chengdu 610106, China

<sup>b</sup>School of Physics, University of Electronic Science and Technology of China, Chengdu 611700, China

<sup>c</sup>Western Superconducting Technologies Co, Ltd., Xi'an 710018, China

<sup>d</sup>College of Physics and Energy, Fujian Normal University, Fuzhou 350117, China

<sup>e</sup>College of Physics and Center of Quantum Materials and Devices, Chongqing University, Chongqing 401331, China

\*E-mail: [liang.qiao@uestc.edu.cn](mailto:liang.qiao@uestc.edu.cn) (L. Q.), [zhaoyong@cdu.edu.cn](mailto:zhaoyong@cdu.edu.cn) (Y. Z.),  
and [ganly@cqu.edu.cn](mailto:ganly@cqu.edu.cn) (L.-Y. G.)

## Gibbs Free Energy Computations

The electrochemical ORR reactions can be divided into  $2e^-$  ORR and  $4e^-$  ORR [1]. For the  $4e^-$  ORR reaction, the reaction intermediates include  $OOH^*$ ,  $O^*$ , and  $OH^*$ , and the product is  $H_2O$  [2]. For the  $2e^-$  ORR reactions, the only reaction intermediate is  $OOH^*$  and the product is  $H_2O_2$  [3]. The  $\Delta G$  of intermediates  $OOH^*$ ,  $O^*$ , and  $OH^*$  were calculated as follows:

$$\Delta G_{OOH} = G_{OOH} - G_* - (2G_{H_2O} - 3/2G_{H_2}) \quad (1)$$

$$\Delta G_O = G_O - G_* - (G_{H_2O} - G_{H_2}) \quad (2)$$

$$\Delta G_{OH} = G_{OH} - G_* - (G_{H_2O} - 1/2G_{H_2}) \quad (3)$$

$$G_{O_2}(g) = 2G_{H_2O}(l) - 2G_{H_2} + 4 \times 1.23 \quad (4)$$

where  $*$  denotes the adsorption carrier of TM-GY. where  $G_*$  represents the total energy of the TM-GY, and  $G_{OOH}$ ,  $G_O$  and  $G_{OH}$  denote the total energies when the intermediates  $OOH^*$ ,  $O^*$ , and  $OH^*$  are adsorbed on TM-GY, respectively. Due to inaccuracies in DFT calculations for gaseous  $O_2$  in the high spin ground state,  $G_{O_2}(g)$  was calculated using Eq. (4), assuming equilibrium between gas-phase and liquid-phase water at room temperature reached equilibrium [4].

### The $2e^-$ ORR reaction process:

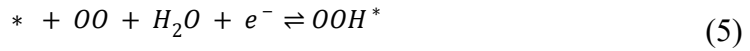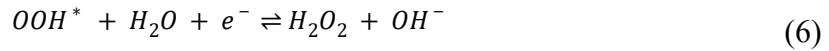

### The $4e^-$ ORR reaction process:

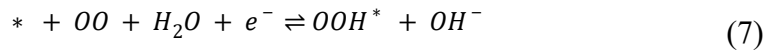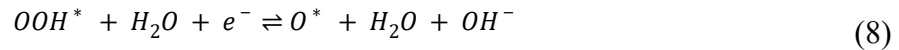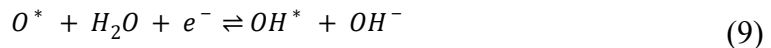

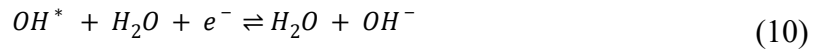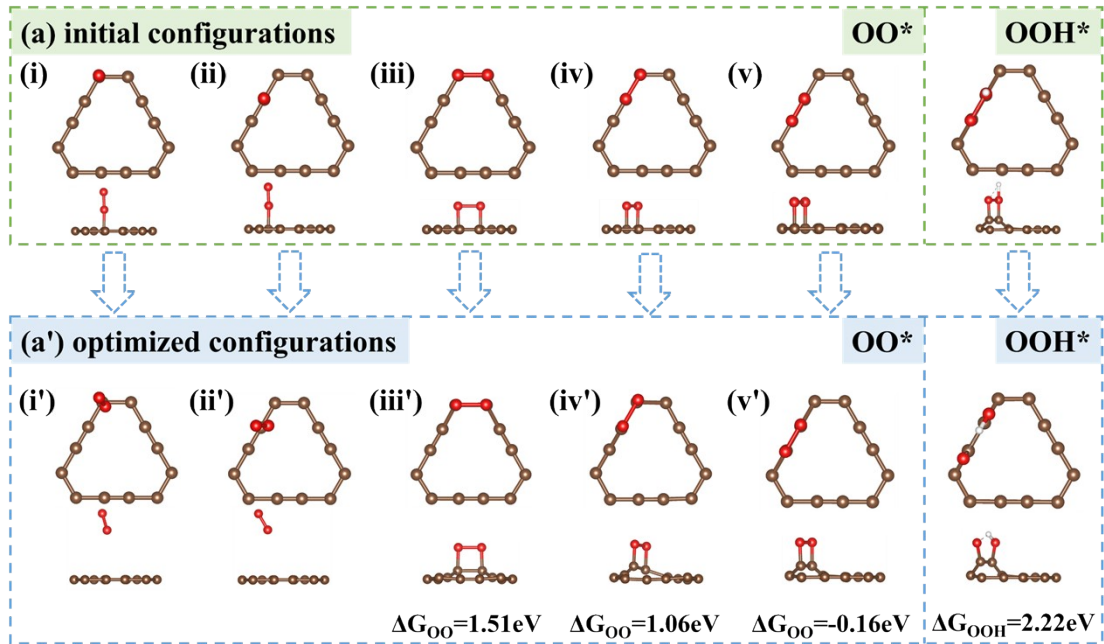

Fig. S1. The H<sub>2</sub>O<sub>2</sub> performance of primitive GY.

**(a) side-on**

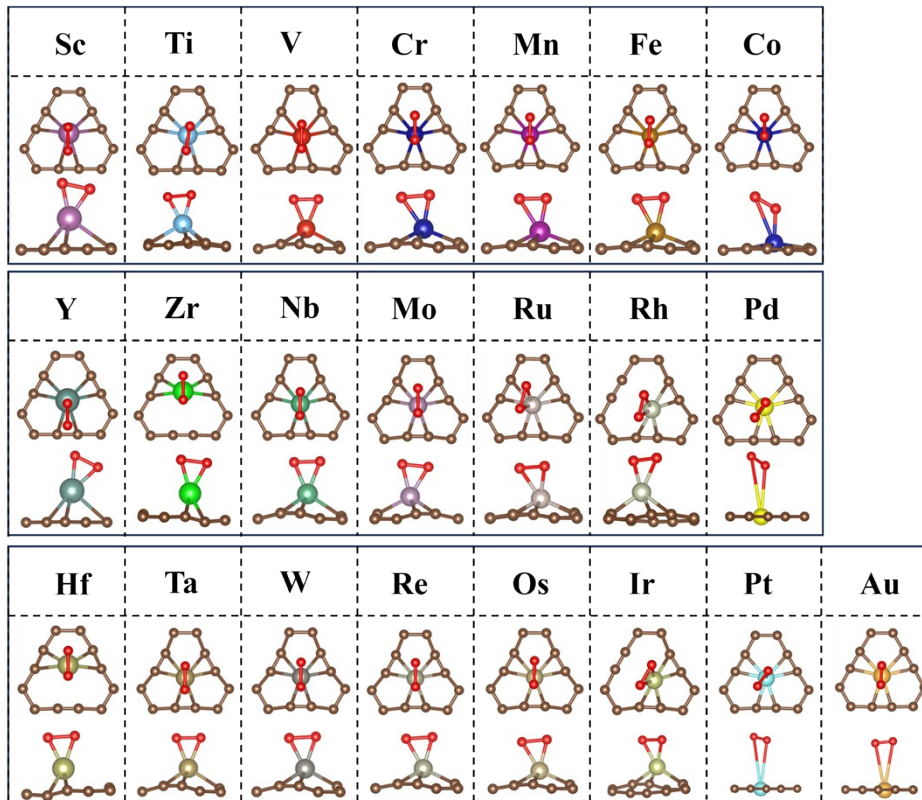

**(b) end-on**

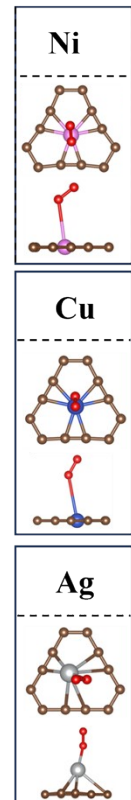

Fig. S2. The side-on and end-on O<sub>2</sub> adsorption configurations on TM-GY.

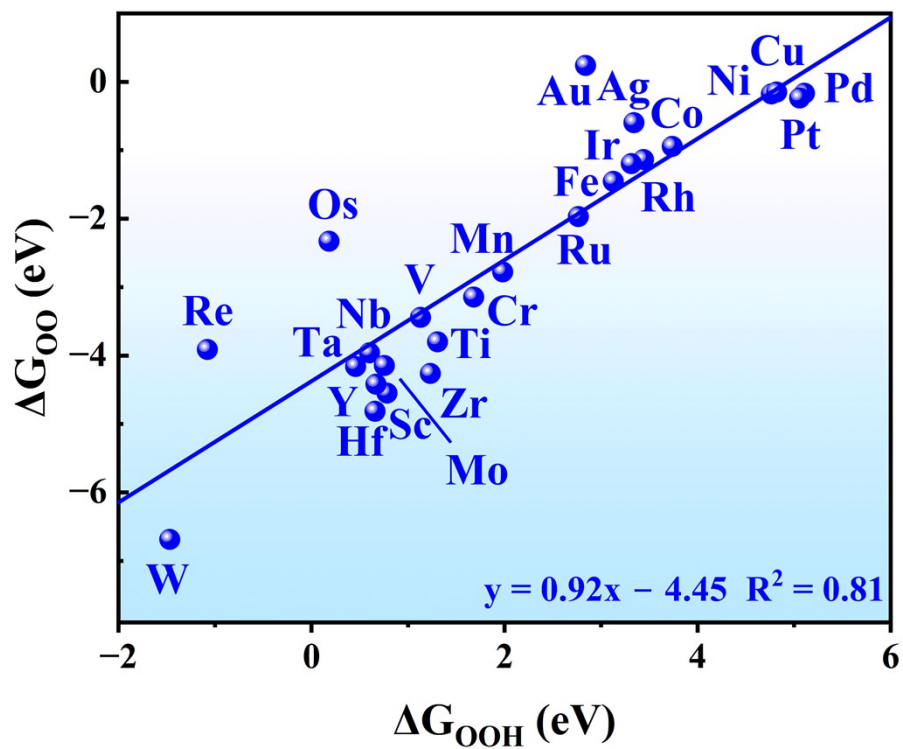

Fig. S3. The relationship between  $\Delta G_{OOH}$  and  $\Delta G_{OO}$ .

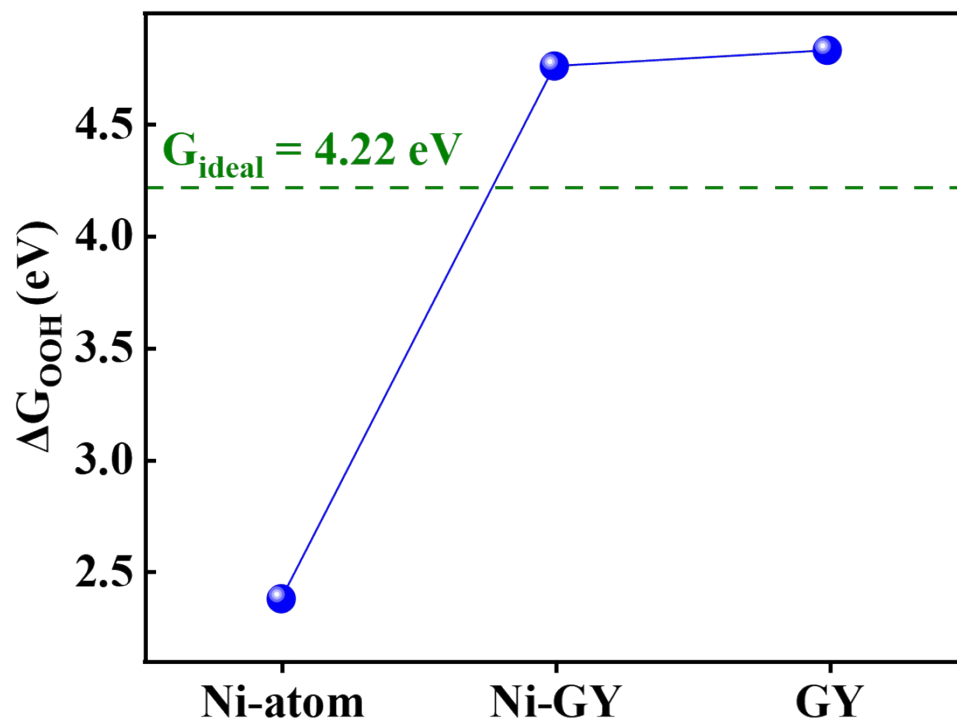

Fig. S4. Comparison of  $\Delta G_{OOH}$  of Ni-atom, Ni-GY, GY.



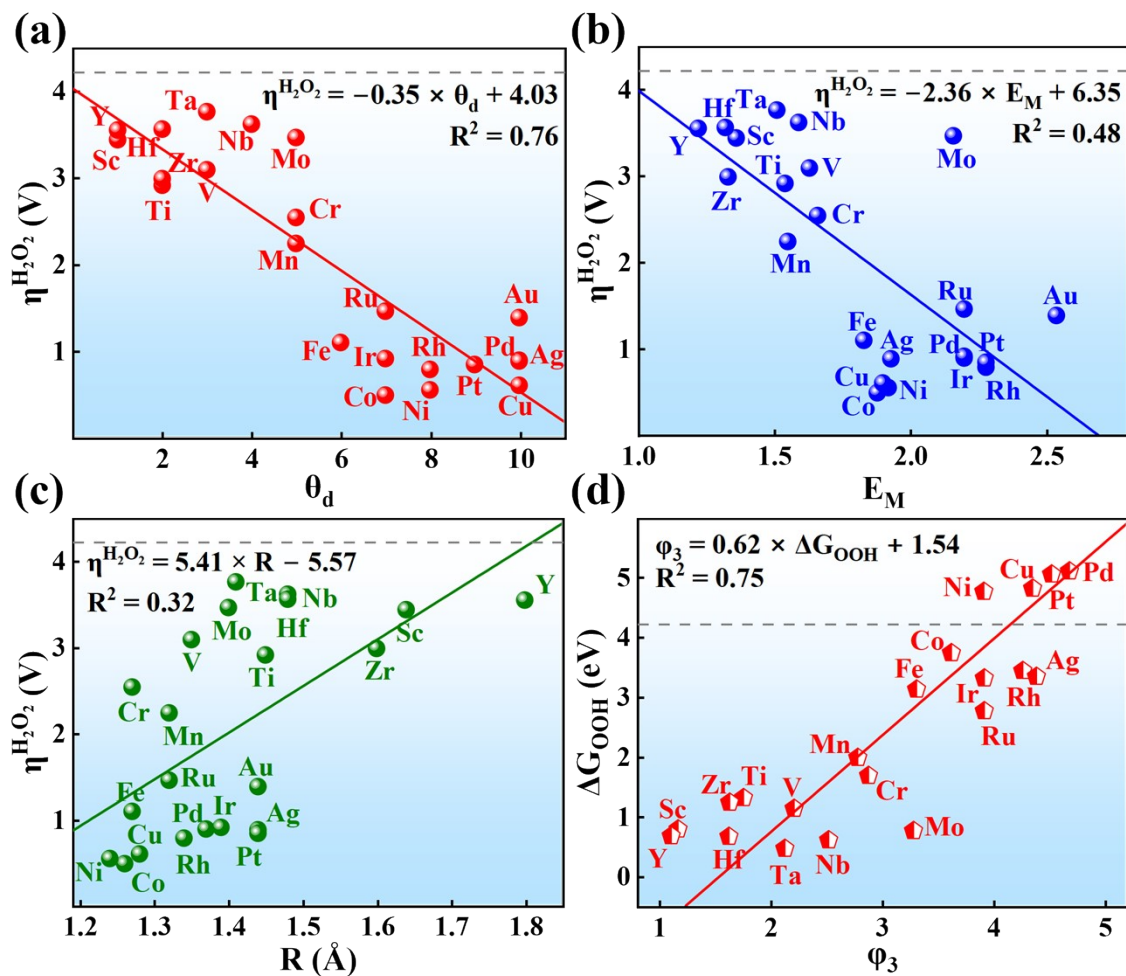

**Fig. S6.** The scaling relationship between  $\eta^{\text{H}_2\text{O}_2}$  and d electrons( $\theta_d$ ) (a), the electronegativity ( $E_M$ ) (b), and the atomic radius ( $R$ ) (c). (d)The scaling relationship between  $\Delta G_{\text{OOH}}$  and  $\phi_3$  for TM-GY.

(a) TM-GY

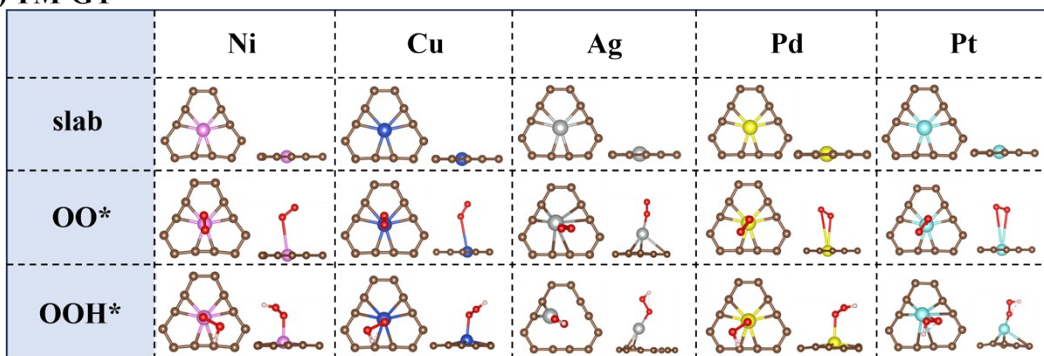

(b) TM-B-GY

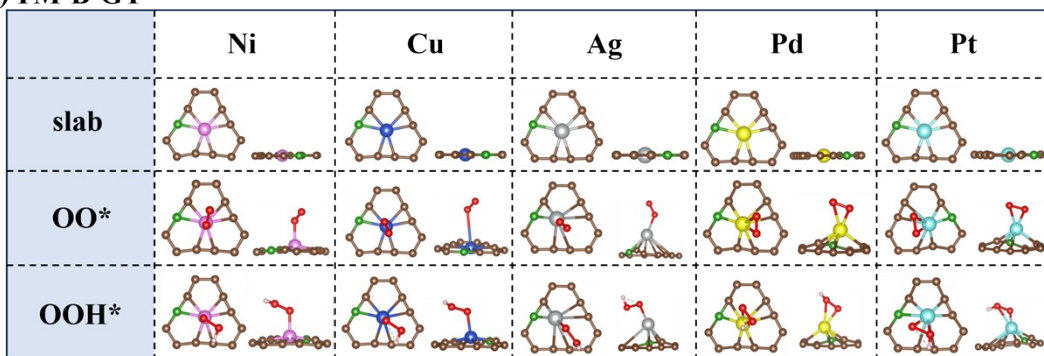

(c) TM-N-GY

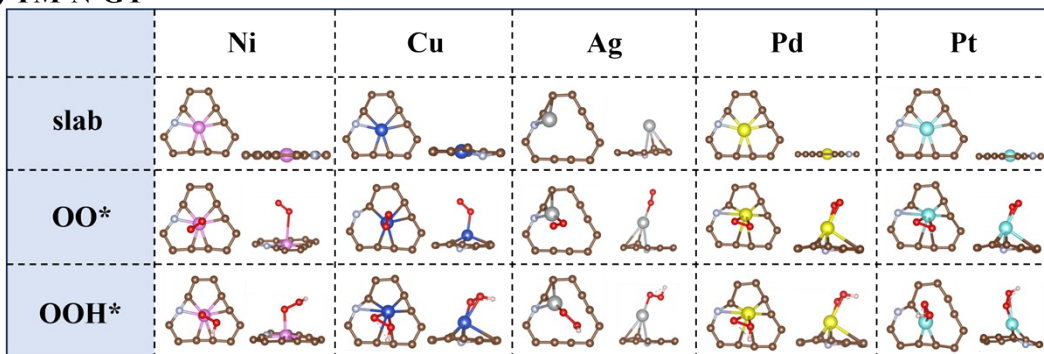

(d) TM-v-GY

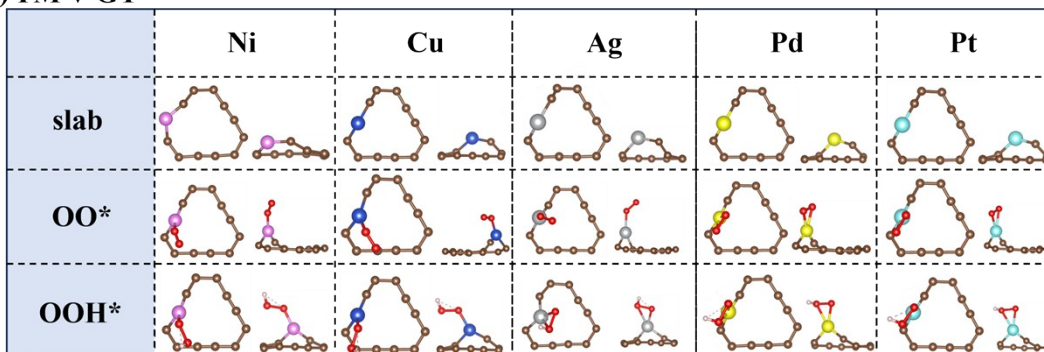

Fig. S7. The configuration of OO\* and OOH\* for TM-GY, TM-B-GY, TM-N-GY, and TM-v-GY.

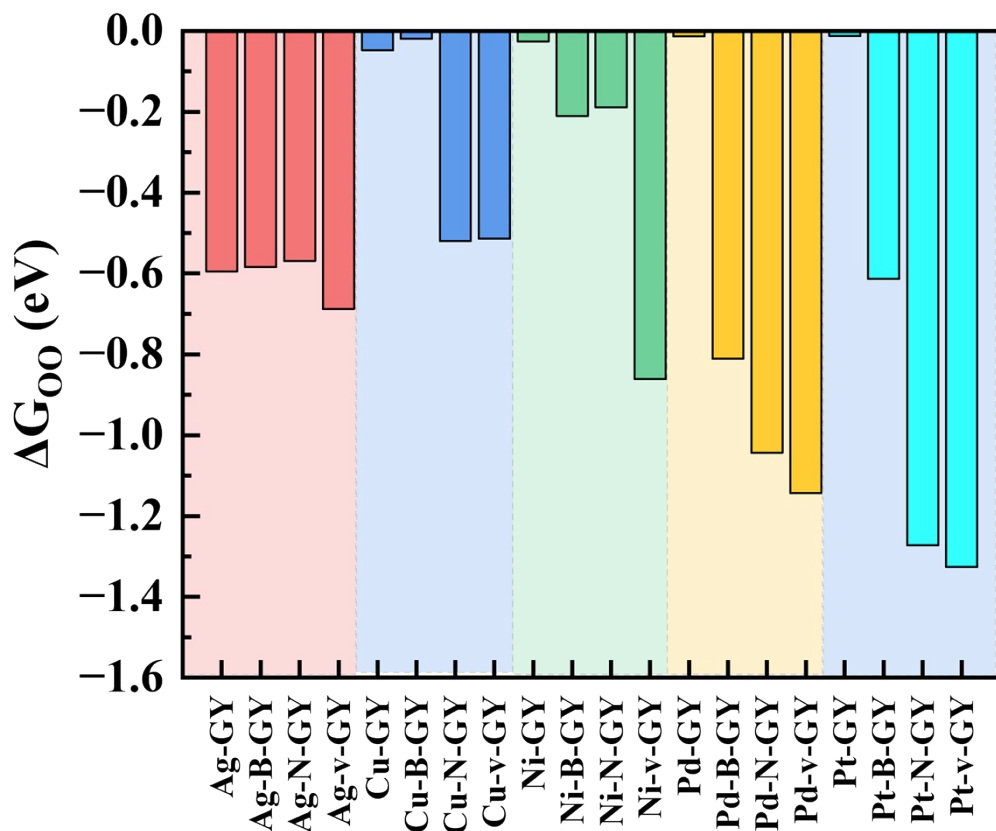

Fig. S8. The  $\Delta G_{00}$  for TM-NM-GY (TM = Ag, Cu, Ni, Pd and Pt; NM = B, N doping or C vacancy).

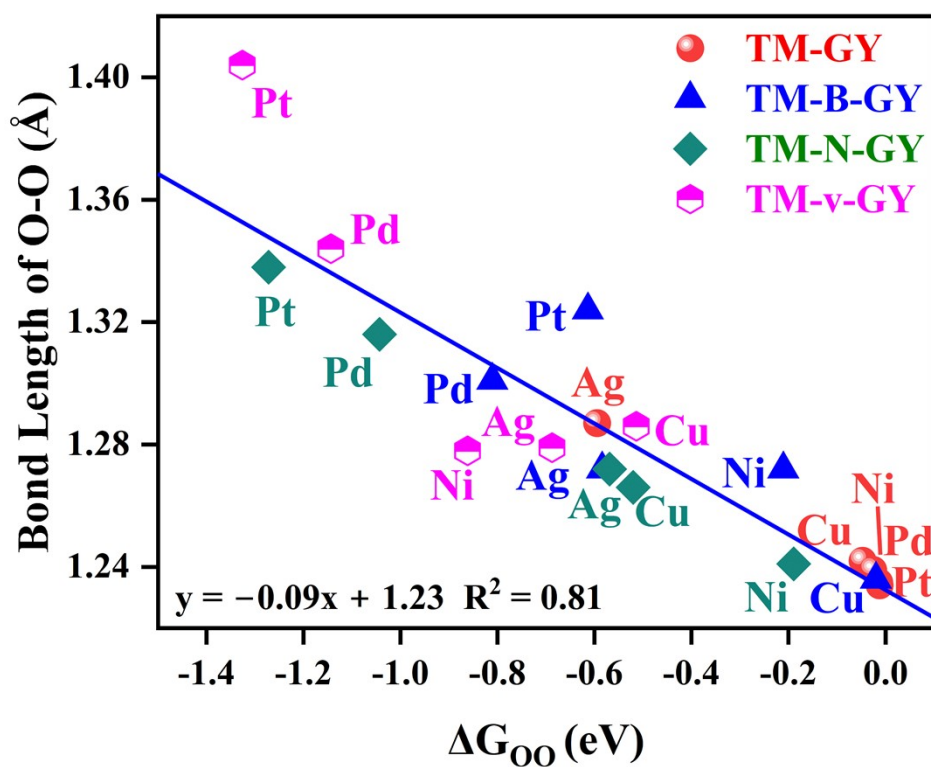

Fig. S9. The relationship between the  $\Delta G_{00}$  and the O-O bond length on TM-NM-GY.



**(a) TM-GY**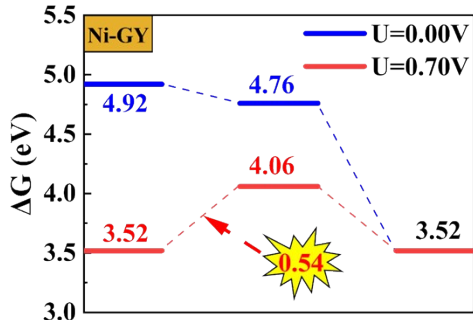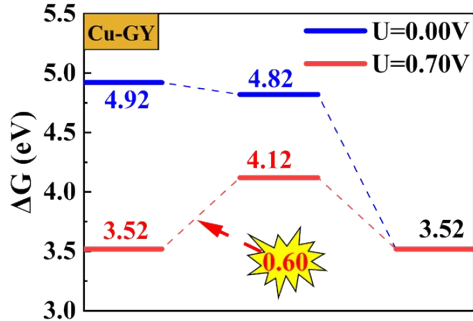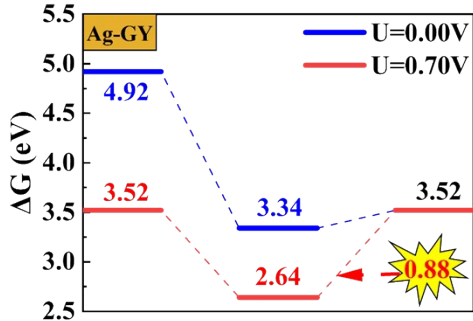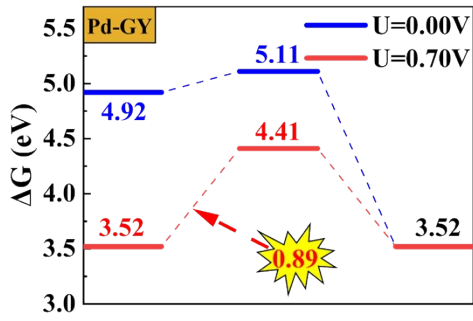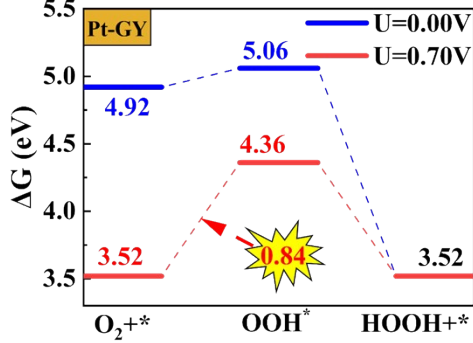**(b) TM-B-GY**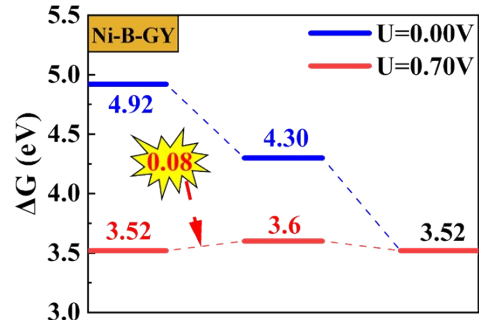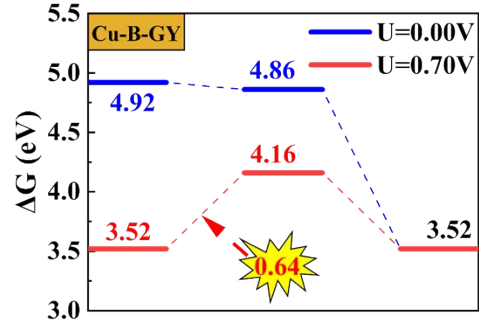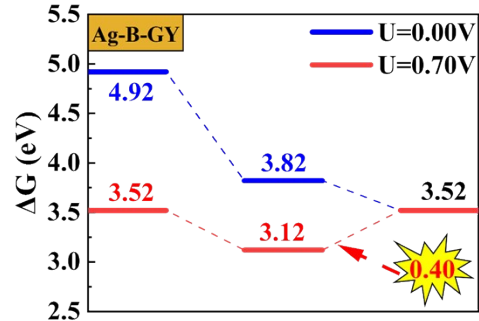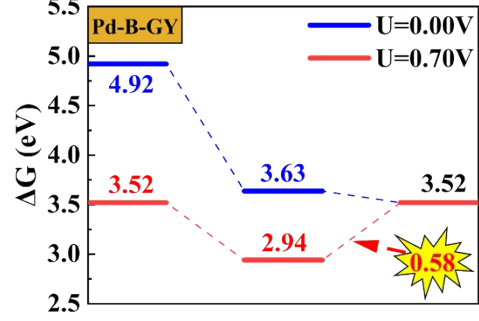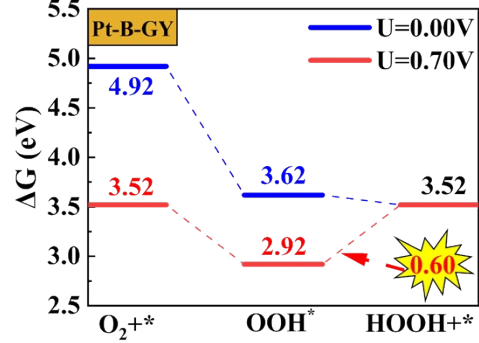

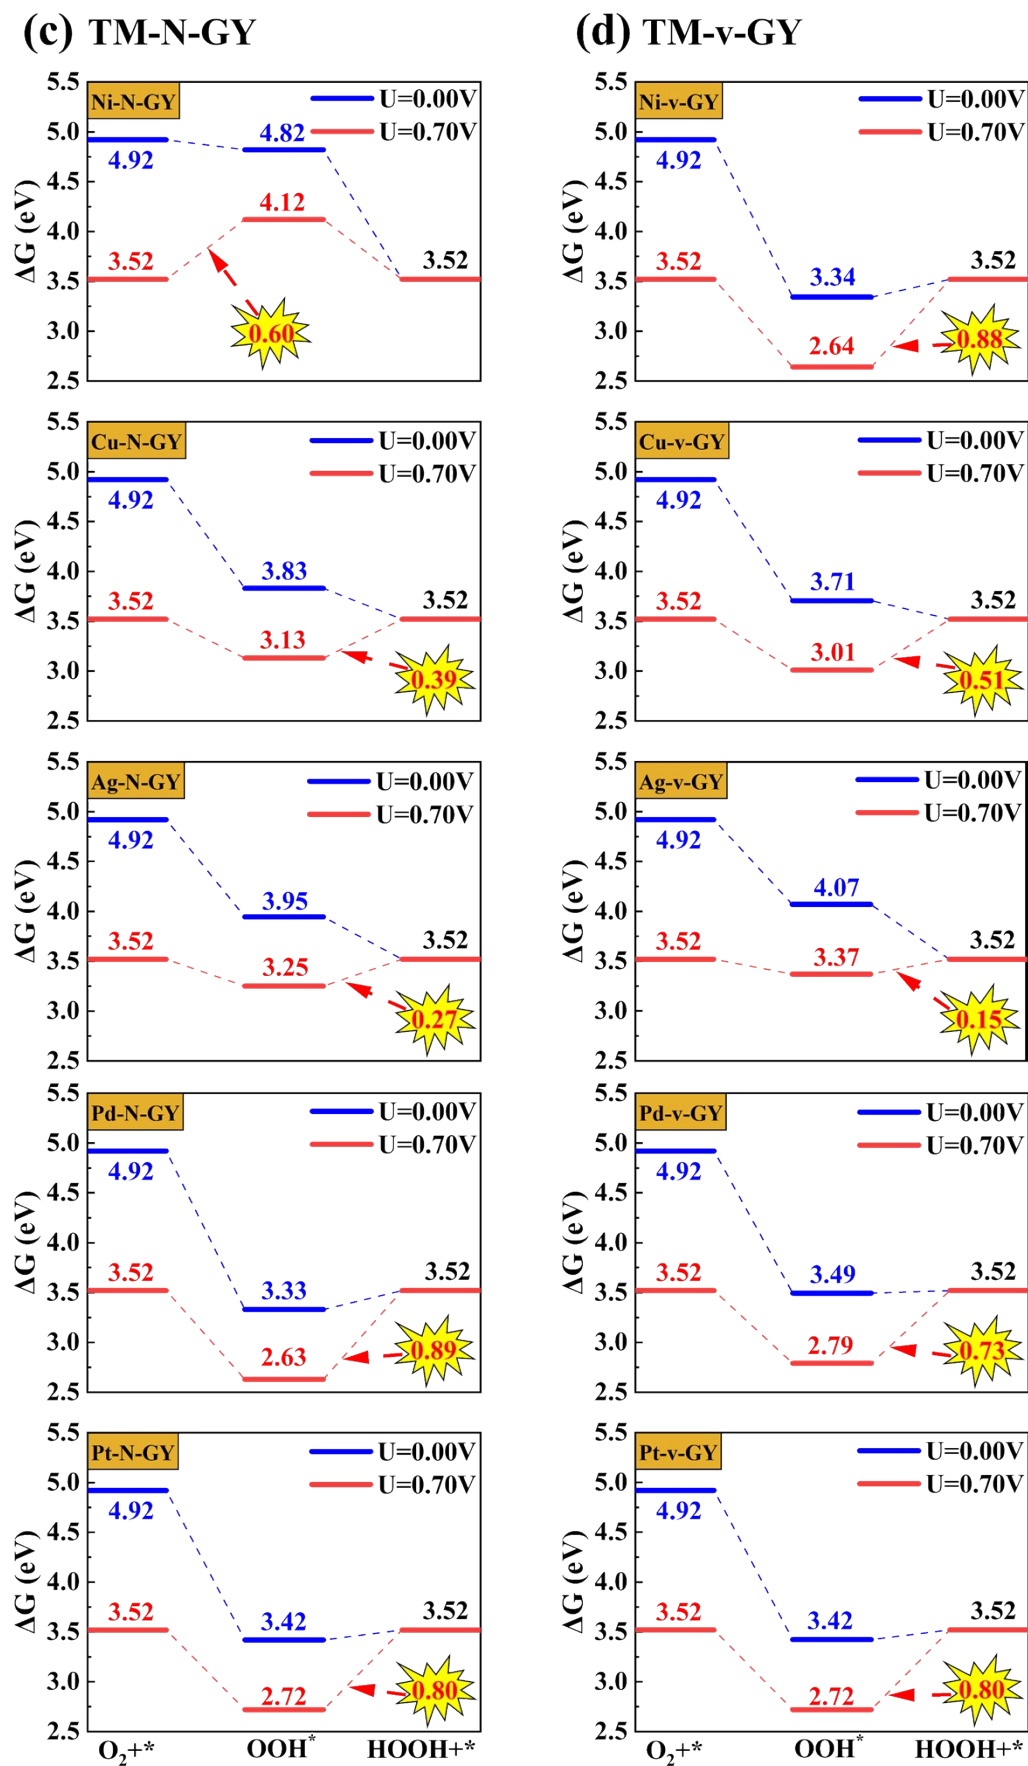

Fig. S10. The Free energy diagrams of  $2e^-$  ORR for  $H_2O_2$  product on TM-NM-GY.

(a) TM-GY

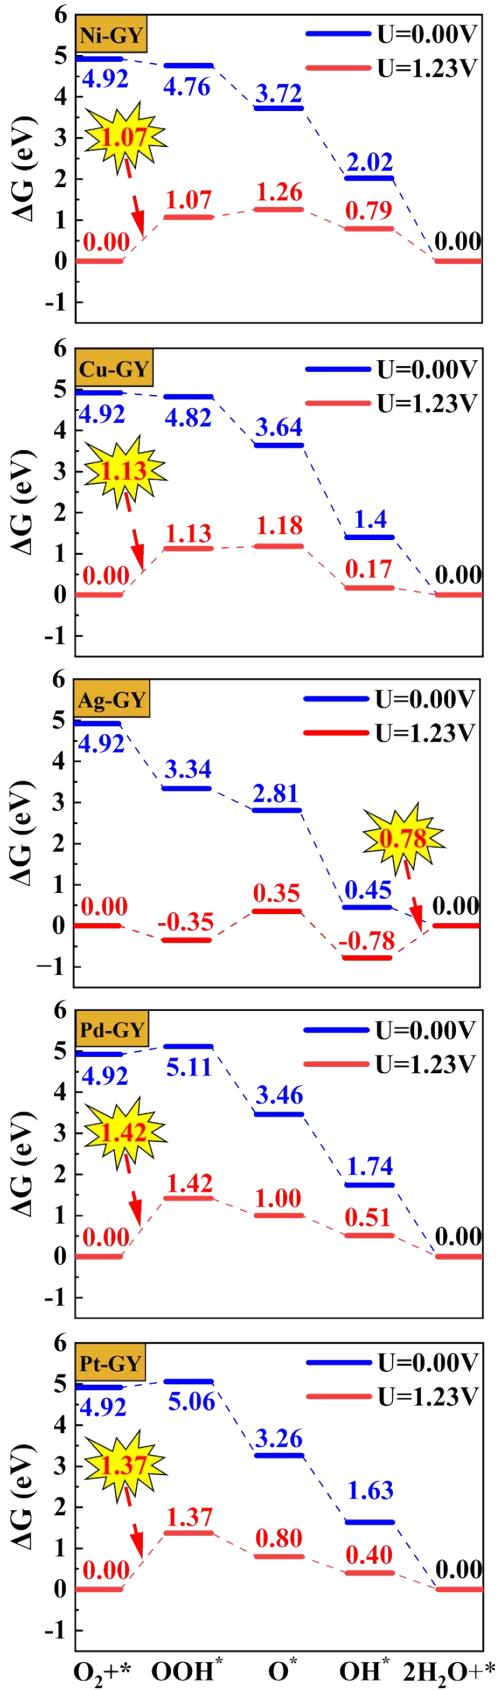

(b) TM-B-GY

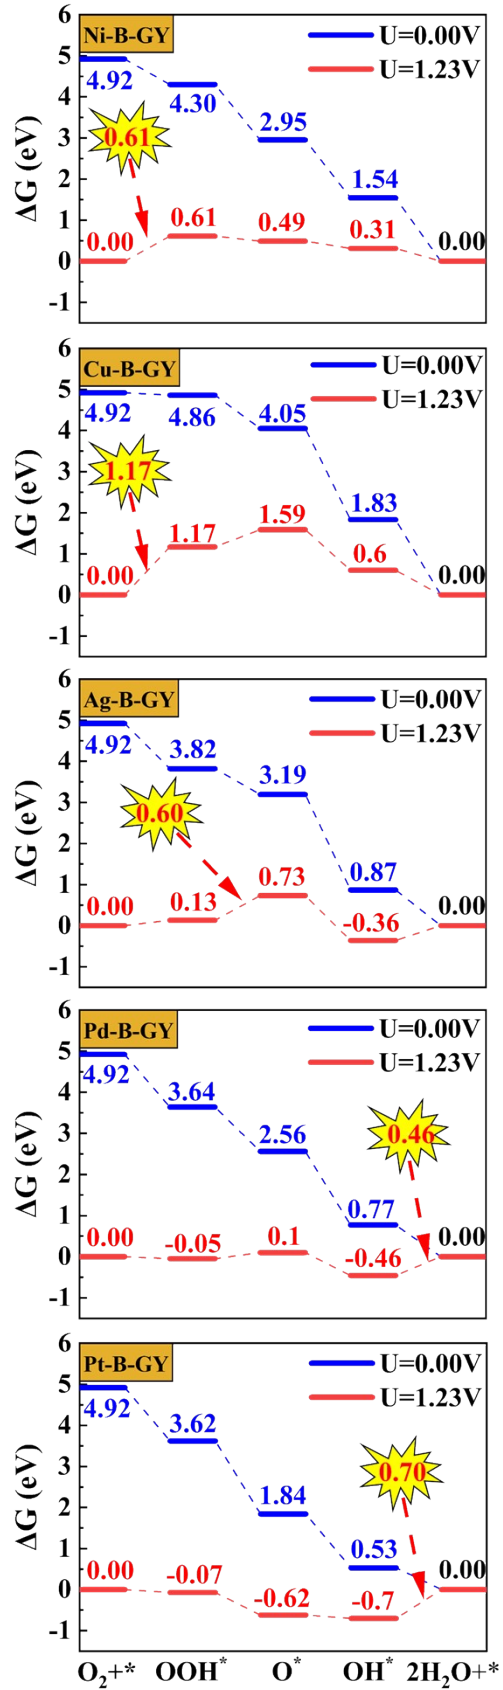

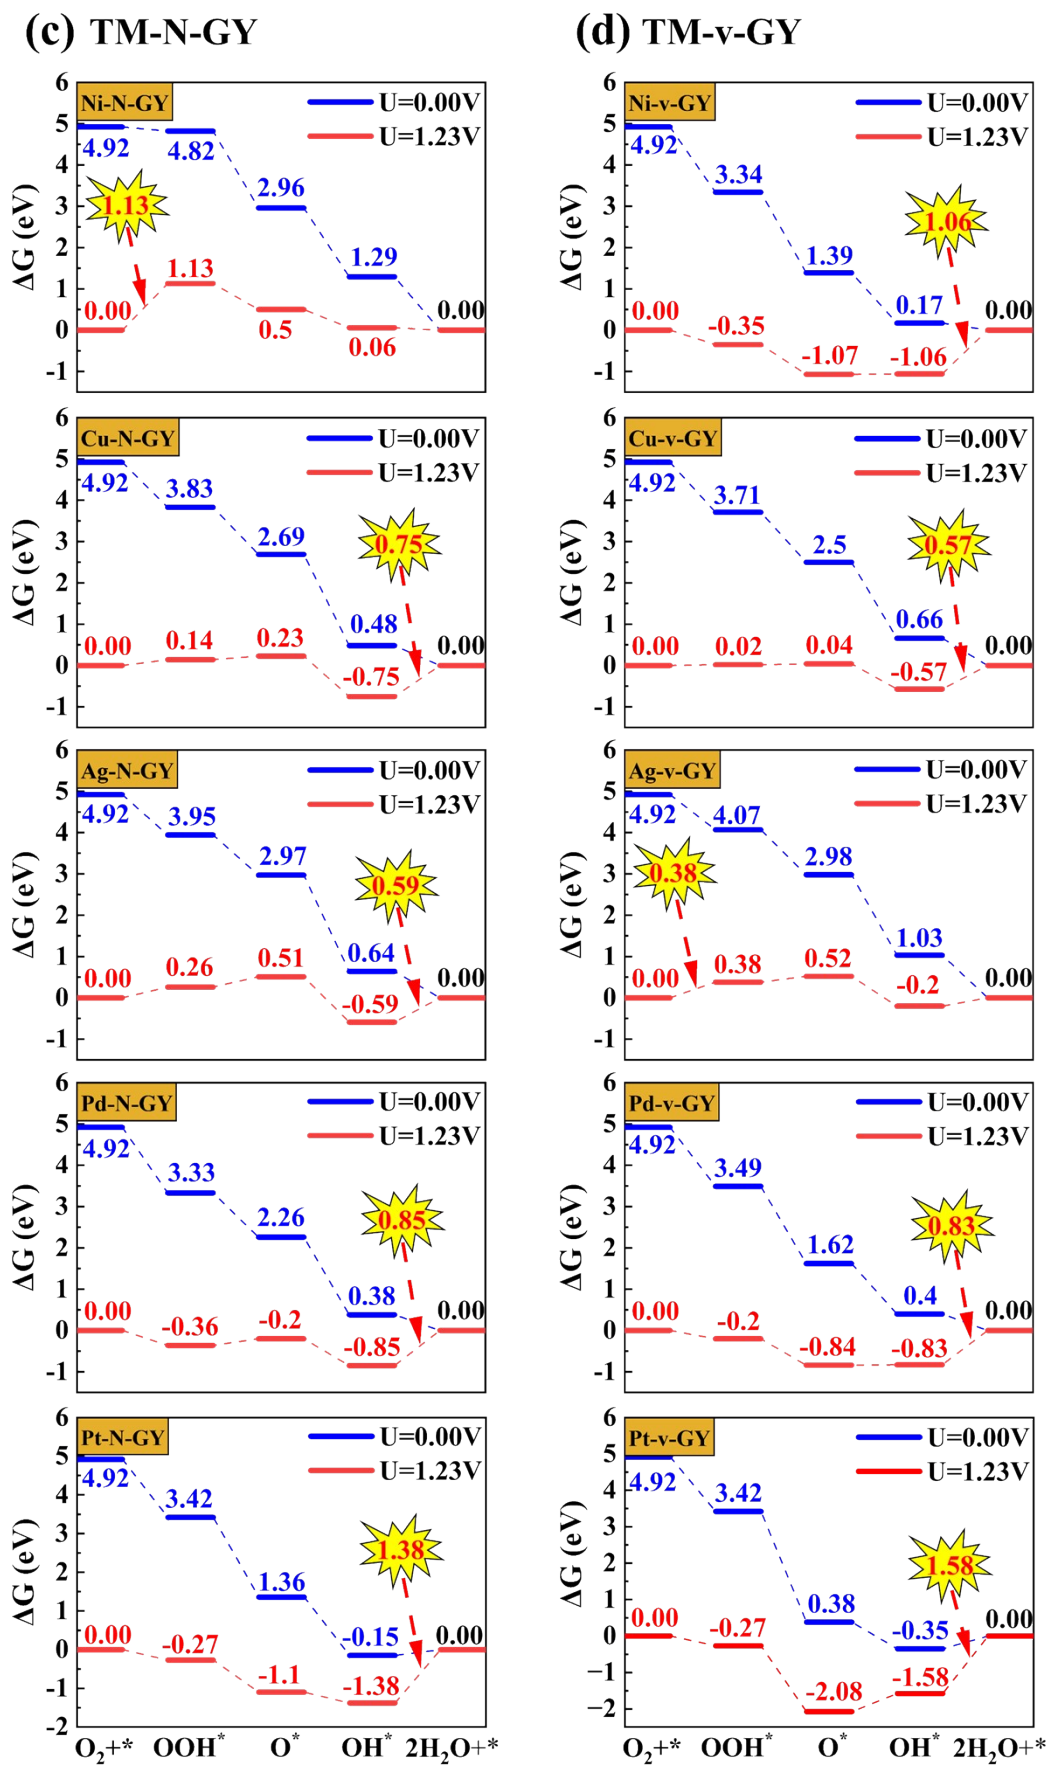

Fig. S11. The Free energy diagrams of  $4e^-$  ORR for  $H_2O$  product on TM-NM-GY.

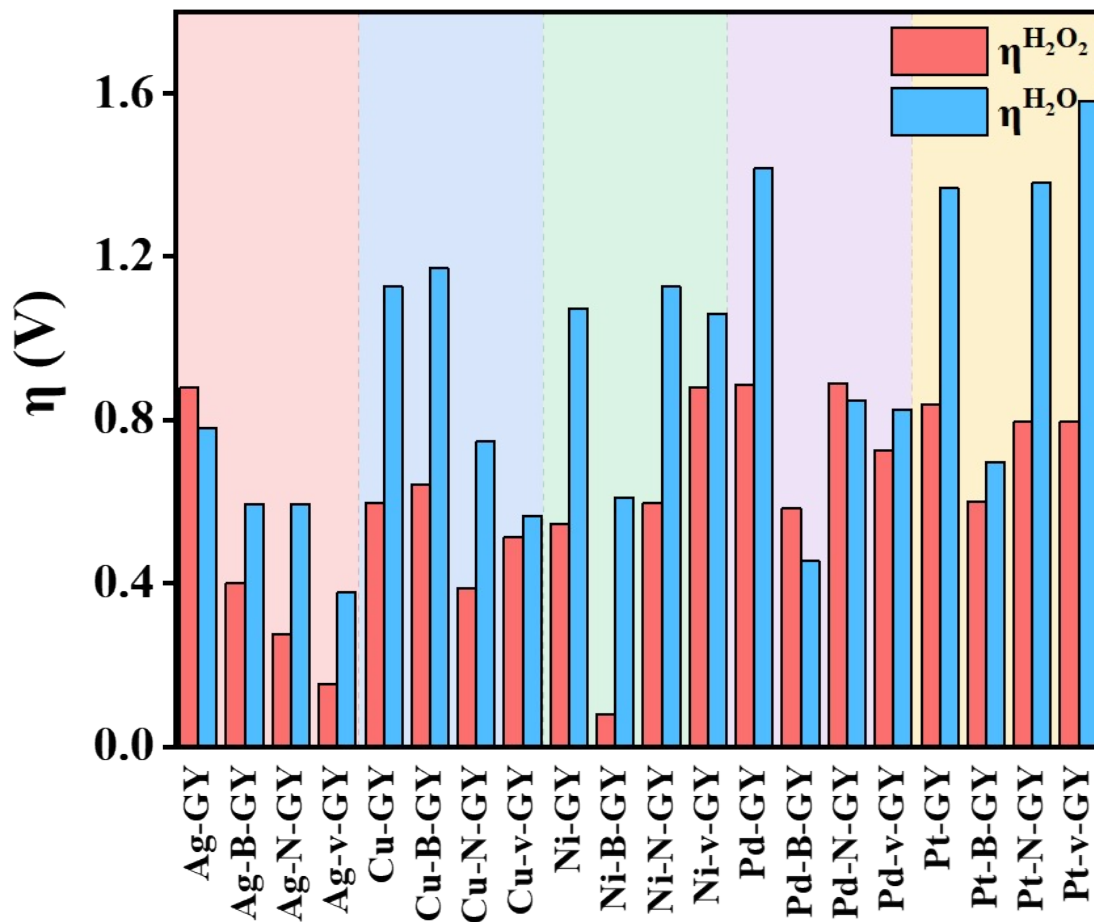

Fig. S12. The selectivity of TM-NM-GY by compare the overpotential of  $\eta_{\text{H}_2\text{O}_2}$  and  $\eta_{\text{H}_2\text{O}}$ .

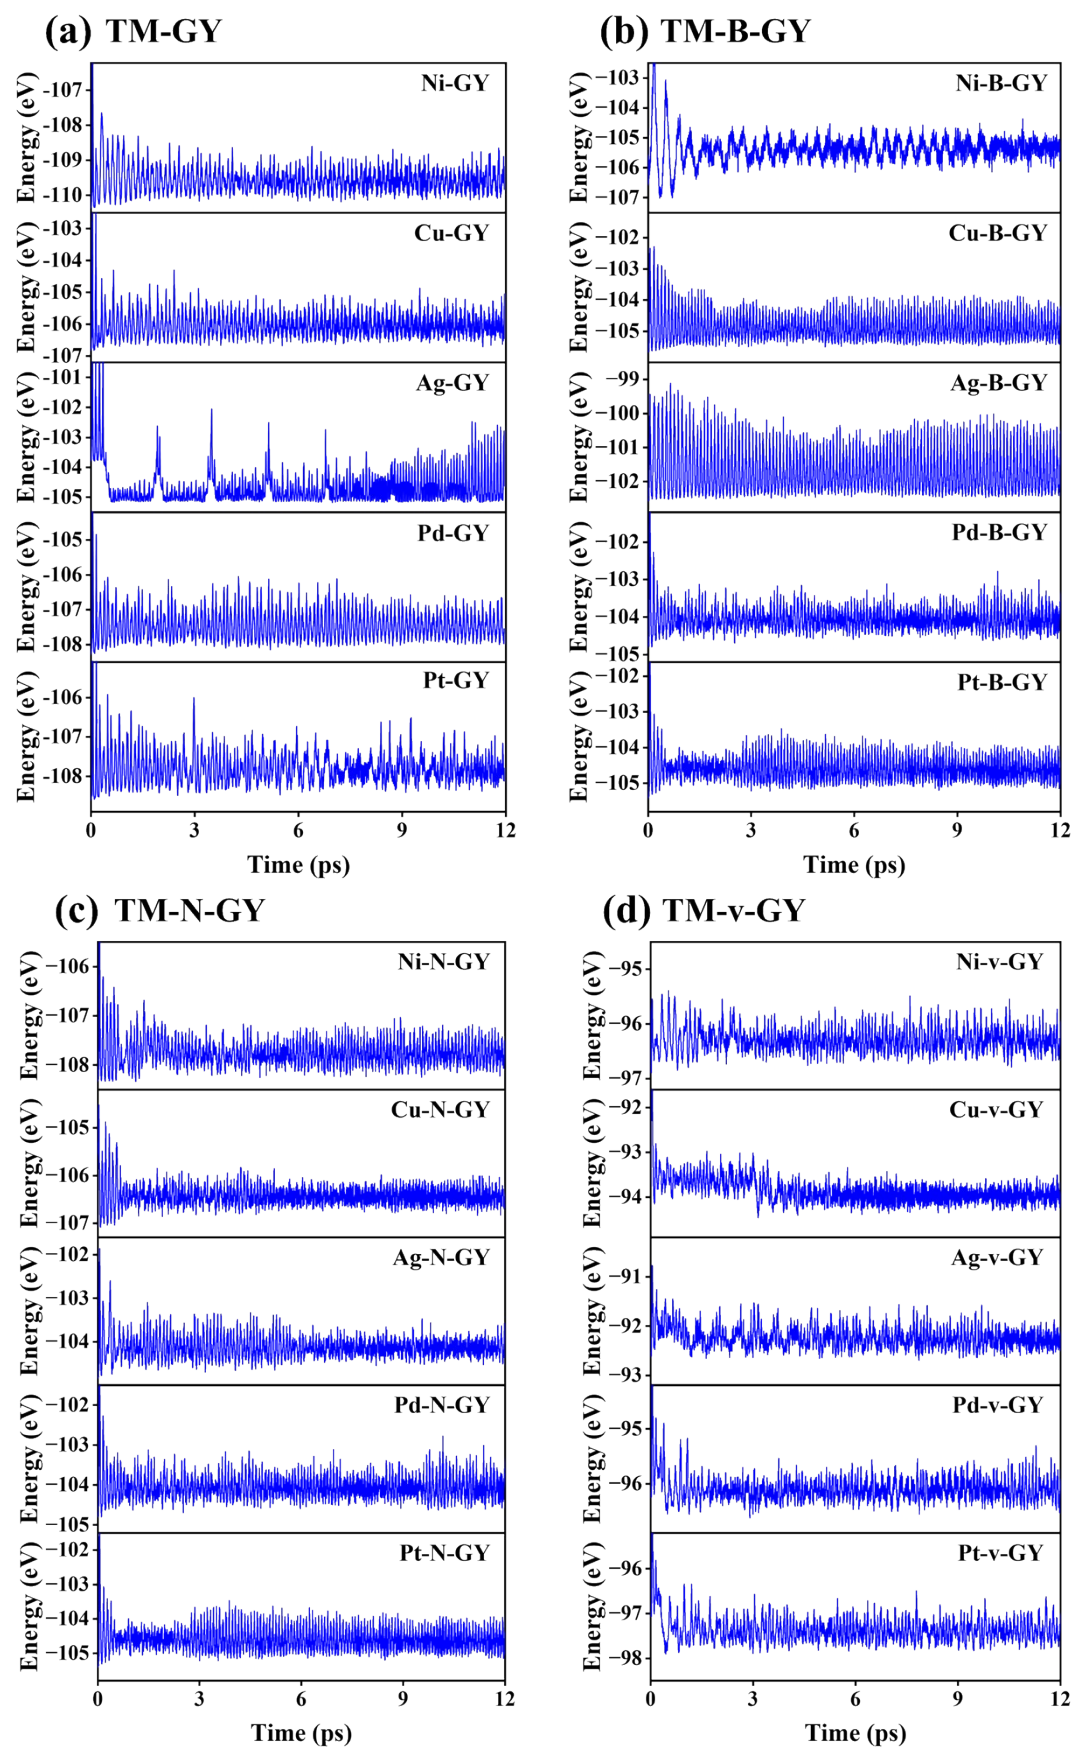

Fig. S13. The AIMD calculation for TM-NM-GY catalysts at 300 K from 0 to 12 ps.

|         | Energy | AIMD | Electrochemical | Comprehensive stability |
|---------|--------|------|-----------------|-------------------------|
| Ni-GY   | √      | √    | ×               |                         |
| Cu-GY   | ×      | √    | √               |                         |
| Ag-GY   | ×      | ×    | ×               |                         |
| Pd-GY   | ×      | √    | √               |                         |
| Pt-GY   | ×      | √    | √               |                         |
| Ni-B-GY | √      | √    | √               | √                       |
| Cu-B-GY | √      | √    | √               | √                       |
| Ag-B-GY | ×      | ×    | √               |                         |
| Pd-B-GY | ×      | √    | √               |                         |
| Pt-B-GY | ×      | √    | √               |                         |
| Ni-N-GY | ×      | √    | ×               |                         |
| Cu-N-GY | ×      | √    | ×               |                         |
| Ag-N-GY | ×      | ×    | ×               |                         |
| Pd-N-GY | ×      | √    | √               |                         |
| Pt-N-GY | ×      | √    | √               |                         |
| Ni-v-GY | √      | √    | √               | √                       |
| Cu-v-GY | √      | √    | √               | √                       |
| Ag-v-GY | √      | √    | √               | √                       |
| Pd-v-GY | √      | √    | √               | √                       |
| Pt-v-GY | √      | √    | √               | √                       |

Fig. S14. Comprehensive evaluation of stability summary for TM-NM-GY.

|         | Stability | Active ( $\eta < 0.6V$ ) | Selectivity | All performance |
|---------|-----------|--------------------------|-------------|-----------------|
| Ni-GY   | ×         | √                        | √           |                 |
| Cu-GY   | ×         | √                        | √           |                 |
| Ag-GY   | ×         | ×                        | ×           |                 |
| Pd-GY   | ×         | ×                        | √           |                 |
| Pt-GY   | ×         | ×                        | √           |                 |
| Ni-B-GY | √         | √                        | √           | √               |
| Cu-B-GY | √         | ×                        | √           |                 |
| Ag-B-GY | ×         | √                        | √           |                 |
| Pd-B-GY | ×         | √                        | ×           |                 |
| Pt-B-GY | ×         | √                        | √           |                 |
| Ni-N-GY | ×         | √                        | √           |                 |
| Cu-N-GY | ×         | √                        | √           |                 |
| Ag-N-GY | ×         | √                        | √           |                 |
| Pd-N-GY | ×         | ×                        | ×           |                 |
| Pt-N-GY | ×         | ×                        | √           |                 |
| Ni-v-GY | √         | ×                        | √           |                 |
| Cu-v-GY | √         | √                        | √           | √               |
| Ag-v-GY | √         | √                        | √           | √               |
| Pd-v-GY | √         | ×                        | √           |                 |
| Pt-v-GY | √         | ×                        | √           |                 |

**Fig. S15.** Comprehensive evaluation summary of overall catalytic performance through activity, selectivity, and stability for TM-NM-GY.



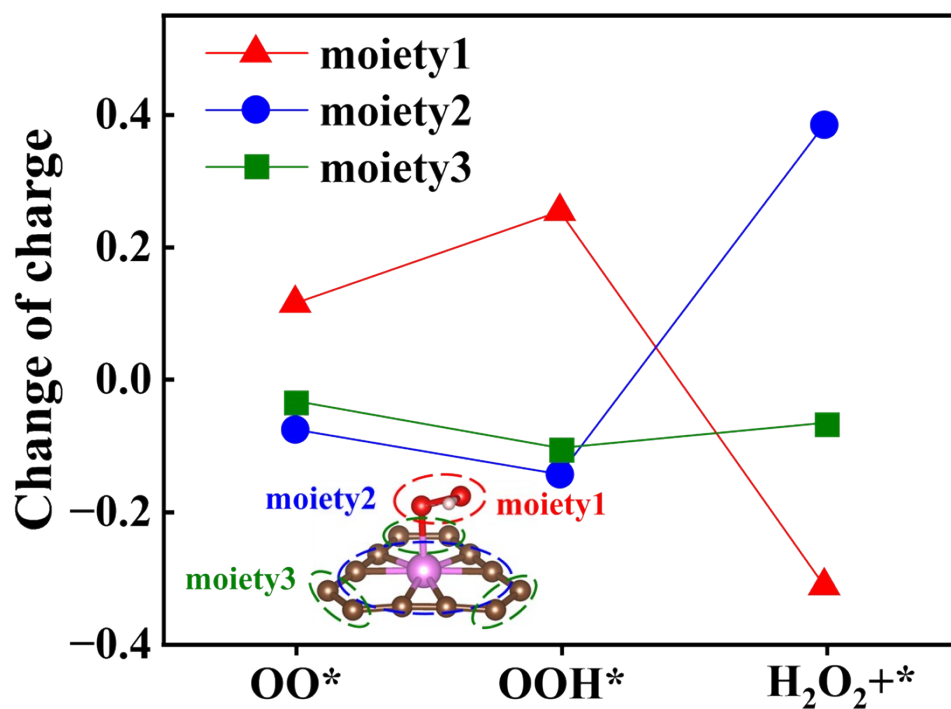

Fig. S16. The charge variation of 2e<sup>-</sup> ORR reaction for Ni-GY.

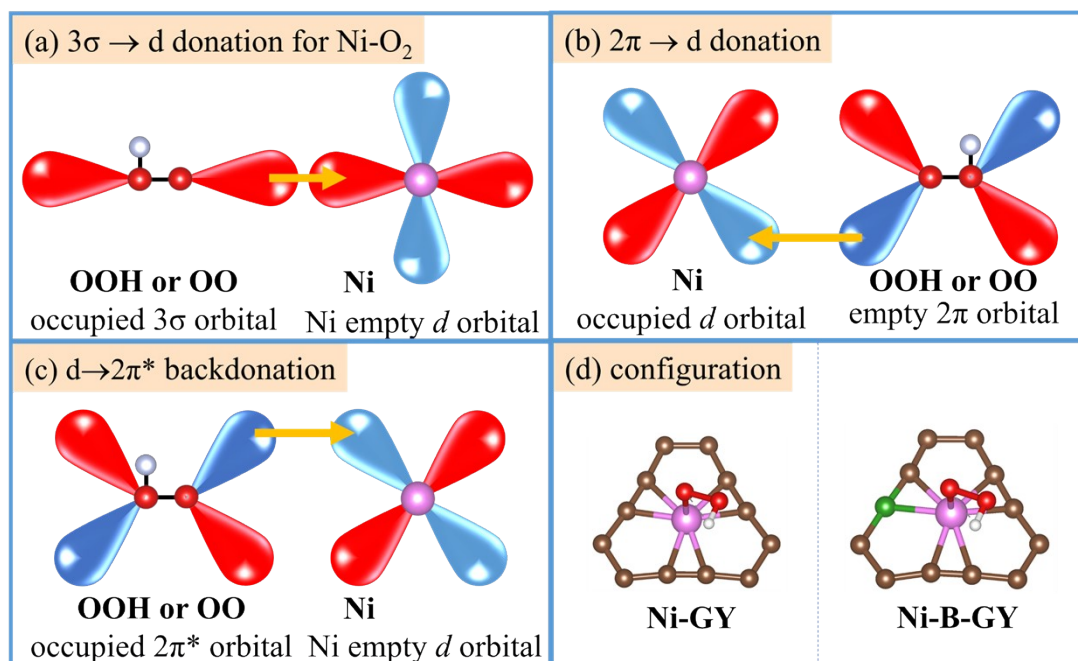

Fig. S17. The donation and back-donation models between Ni and OO or OOH.

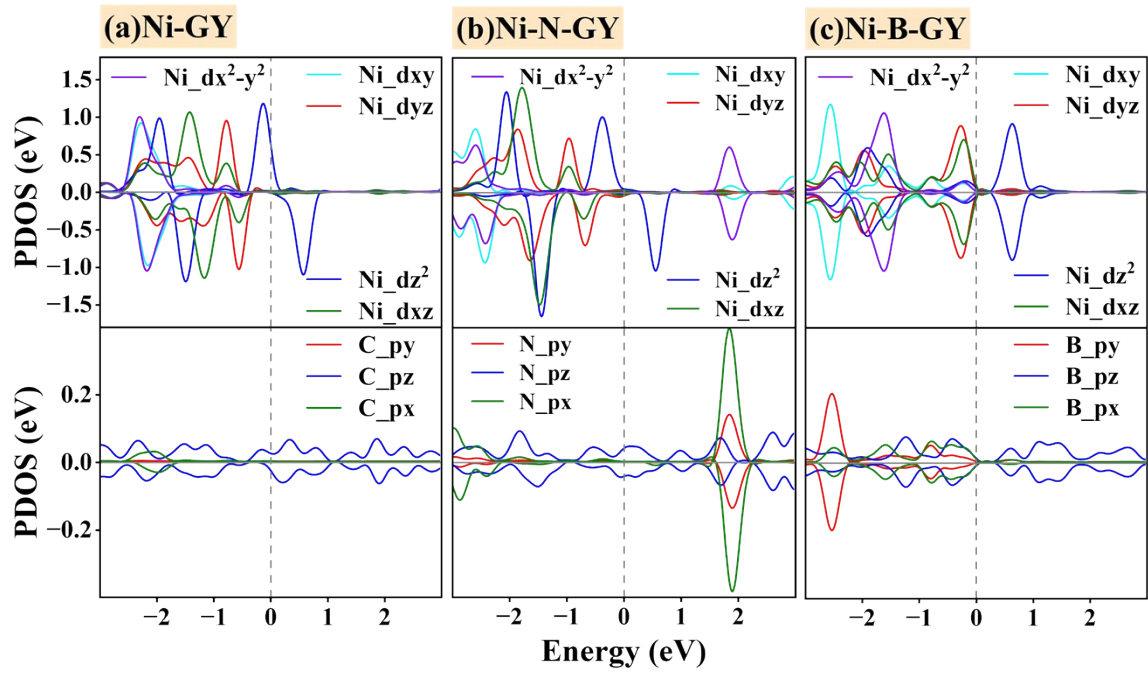

Fig. S18. The PDOS of C, N, B and Ni for Ni-GY, Ni-N-GY and Ni-B-GY.

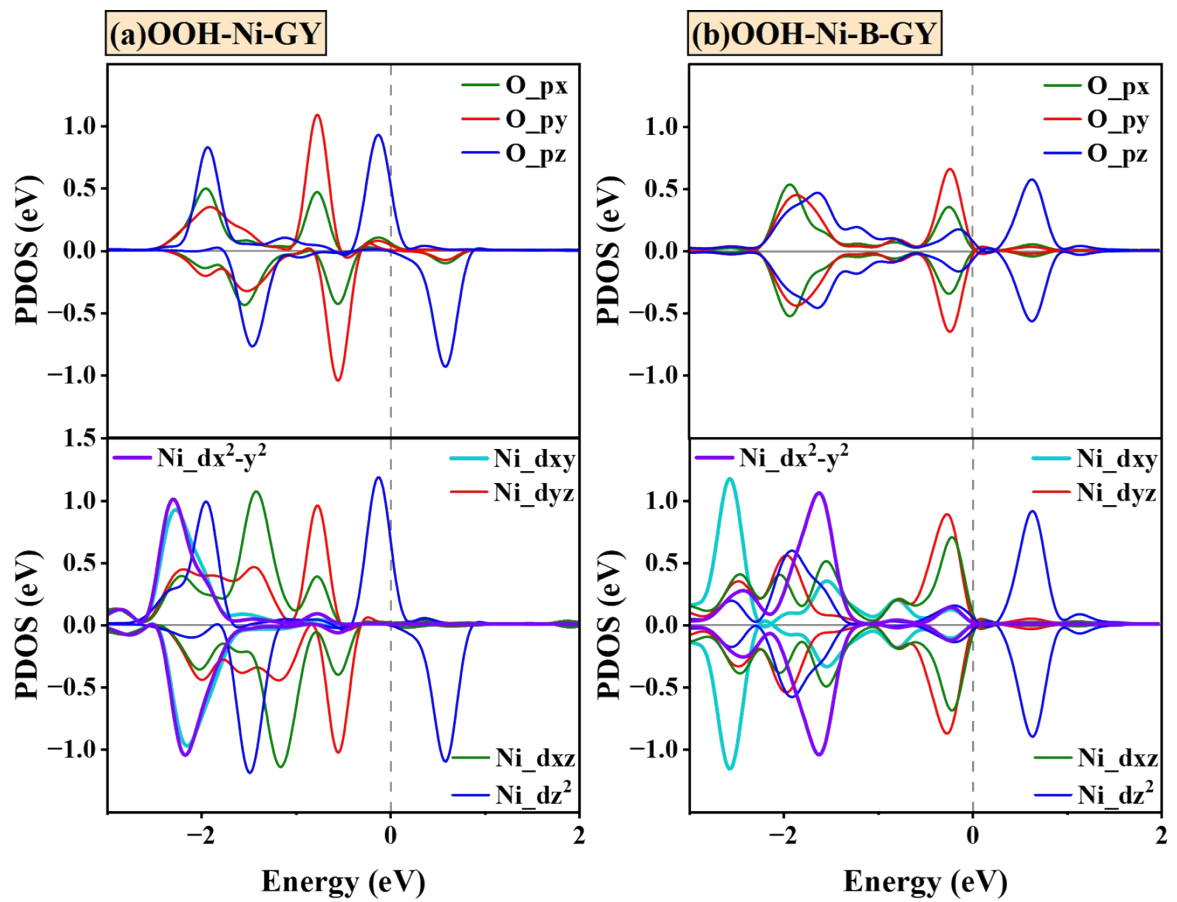

Fig. S19. The PDOS of O (in OOH) and Ni for Ni-GY and Ni-B-GY.

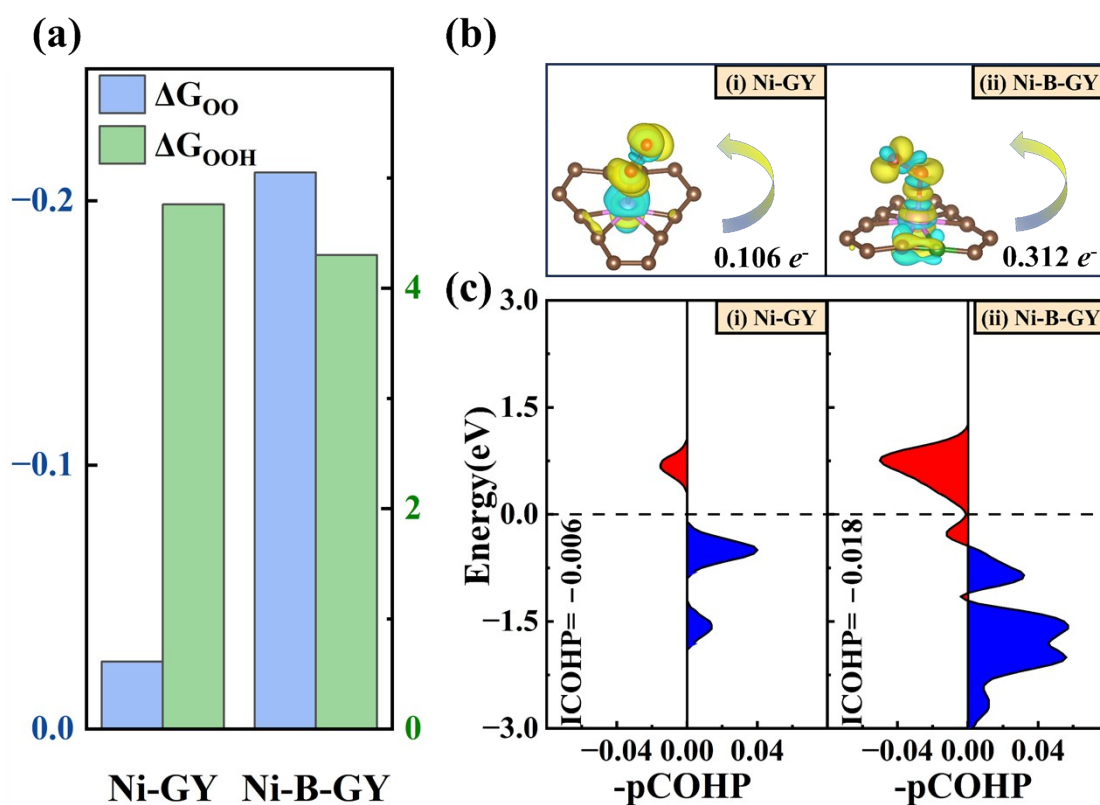

**Fig. S20.** Ni-GY vs Ni-B-GY: (a) The  $\Delta G_{OO}$  and  $\Delta G_{OOH}$ , (b) Charge density difference for  $OO^*$ , (c) The COHP between the O (in  $OO^*$ ) and Ni.

## References

- [1] W. Zhang, Y.J. Gao, Q.J. Fang, J.K. Pan, X.C. Zhu, S.W. Deng, Z.H. Yao, G.L. Zhuang, J.G. Wang, High-performance single-atom Ni catalyst loaded graphyne for  $H_2O_2$  green synthesis in aqueous media, *J. Colloid Inter. Sci.* 599 (2021) 58-67.
- [2] G. Di Liberto, L. Giordano, G. Pacchioni, Predicting the stability of single-atom catalysts in electrochemical reactions, *ACS Catal.* 14(1) (2023) 45-55.
- [3] Y. Cao, C. Zhao, Q. Fang, X. Zhong, G. Zhuang, S. Deng, Z. Wei, Z. Yao, J. Wang, Hydrogen peroxide electrochemical synthesis on hybrid double-atom (Pd-Cu) doped N vacancy  $g-C_3N_4$ : a novel design strategy for electrocatalyst screening, *J. Mater. Chem. A* 8(5) (2020) 2672-2683.
- [4] J. Liu, Catalysis by supported single metal atoms, *ACS Catal.* 7 (1) (2016) 34-59.
